# Supplementary material
Source: Springer Nature journal article supplement (https://www.springermedizin.de/resource/supplementary/12888_2014_1615_MOESM3_ESM.pdf/9480970)
Supplement: MOESM3 [file 9480970]

<Name>'s Care Plan Sheet

Date:

Written by:

|                                      |                                                                                                                                               |
|--------------------------------------|-----------------------------------------------------------------------------------------------------------------------------------------------|
| Present condition                    | <Patient> Being chased by someone, having sleep problem<br><Psychiatrist>Being too irritated, having difficulties to communicate with others. |
| Diagnosis                            | Schizophrenia                                                                                                                                 |
| Reason of hospitalization            | <Patient>Violence toward family member.<br><Psychiatrist>Need of medication.                                                                  |
| Medication<br>Effect and side-effect | Olanzapin 20mg<br>Effect: Cancel confusion of thoughts.<br>Side-effect: Improve appetite.                                                     |
| Legal status                         | Involuntary hospitalized                                                                                                                      |
| Range of activity                    | You need to stay in the ward to avoid too much stimulation.<br>You may go outside of the ward when you are with the ward staff.               |
| Problems at the ward and solutions   | Want more time to go out.<br>→ Start going out with family.                                                                                   |
| Goal of hospital treatment           | Being able to live home with the family without too much irritation.                                                                          |
